# Supplementary material for: HLAProfiler utilizes k-mer profiles to improve HLA calling accuracy for rare and common alleles in RNA-seq data
Source: PubMed Central journal article supplement (PMC5618726; doi:10.1186/s13073-017-0473-6), 2017-09-27
Supplement: 13073_2017_473_MOESM1_ESM.pdf [file 13073_2017_473_MOESM1_ESM.pdf]

SUPPLEMENTAL FIGURES AND TABLES

## **HLAProfiler utilizes *k*-mer profiles to improve HLA calling accuracy**

### **for rare and common alleles in RNA-seq data**

Martin L. Buchkovich<sup>1†</sup>, Chad. C. Brown<sup>1†</sup>, Kimberly Robasky<sup>1</sup>, Shengjie Chai<sup>2,3</sup>, Sharon Westfall<sup>1</sup>, Benjamin G. Vincent<sup>2,3,4</sup>, Eric T. Weimer<sup>5</sup>, Jason G. Powers<sup>1</sup>

†Contributed equally

\*Correspondence: martin.buchkovich@q2labsolutions.com

<sup>1</sup>Translational Genomics Department, Q<sup>2</sup> Solutions | EA Genomics, a Quintile Quest Joint Venture, Morrisville, NC, 27560, USA

<sup>2</sup>Lineberger Comprehensive Cancer Center, University of North Carolina at Chapel Hill, Chapel Hill, NC, 27599, USA

<sup>3</sup>Curriculum in Bioinformatics and Computational Biology, University of North Carolina at Chapel Hill, Chapel Hill, NC, 27599, USA

<sup>4</sup>Division of Hematology/Oncology, Department of Medicine, University of North Carolina at Chapel Hill, Chapel Hill, NC, 27599, USA

<sup>5</sup>Department of Pathology and Laboratory Medicine, University of North Carolina at Chapel Hill, Chapel Hill, NC, 27599, USA

| Population | CEPH | FIN | GBR | TSI | YRI |
|------------|------|-----|-----|-----|-----|
| Count      | 50   | 95  | 90  | 85  | 38  |

Table S1: Counts for each population of real samples used in the current study. Here, CEPH = Utah residents with mostly European ancestry, FIN = Finnish, GBR = British, TSI = Italy, YRI = Nigerian

| Gene | Rare Alleles | Partial Alleles | Novel Alleles | Rare Sim | Updated Sim | Novel Sim |
|------|--------------|-----------------|---------------|----------|-------------|-----------|
| A    | 137          | 10              | 5             | 200      | 18          | 6         |
| B    | 254          | 13              | 9             | 200      | 17          | 8         |
| C    | 240          | 42              | 81            | 200      | 60          | 86        |
| DMA  | 2            | 0               | 0             | 200      | 0           | 0         |
| DMB  | 3            | 0               | 0             | 200      | 0           | 0         |
| DOA  | 7            | 0               | 0             | 200      | 0           | 0         |
| DOB  | 6            | 0               | 0             | 200      | 0           | 0         |
| DPA1 | 5            | 0               | 0             | 200      | 0           | 0         |
| DPB1 | 7            | 0               | 0             | 200      | 0           | 0         |
| DQA1 | 14           | 0               | 0             | 200      | 0           | 0         |
| DQB1 | 50           | 1               | 0             | 200      | 2           | 0         |
| DRA  | 4            | 0               | 0             | 200      | 0           | 0         |
| DRB1 | 19           | 0               | 0             | 200      | 0           | 0         |
| E    | 7            | 1               | 0             | 200      | 3           | 0         |
| F    | 5            | 0               | 0             | 200      | 0           | 0         |
| G    | 17           | 0               | 0             | 200      | 0           | 0         |
| MICA | 13           | 0               | 0             | 200      | 0           | 0         |
| MICB | 6            | 0               | 0             | 200      | 0           | 0         |
| TAP1 | 7            | 0               | 0             | 200      | 0           | 0         |
| TAP2 | 5            | 0               | 0             | 200      | 0           | 0         |

Table S2: Number of alleles available and used for each type of simulated data set. Column “Rare Alleles” describes how many alleles had full sequences available and also were not previously reported as being “common” or “well-documented”. Column “Partial Alleles” describes the number of alleles having partial sequences in IMGT/HLA version 3.24.0 and full sequences in version 3.26.0. Novel Alleles are how many alleles full sequences exist in 3.26.0, but did not exist in 3.24.0. The “Sim” columns describe how many alleles were simulated in each dataset.

| Sample  | Gene  | Exon | Closest allele | Nucleotide change | Amino acid change | Detected by HLAProfiler |
|---------|-------|------|----------------|-------------------|-------------------|-------------------------|
| NA18505 | HLA-A | 6    | 26:01          | bpT2829C          | No                | Yes                     |
| NA19093 | DPA1  | 4    | 03:01          | bpG5418C          | No                | Yes                     |
| NA19130 | DQB1  | 4    | 04:02          | bpC6300T          | No                | Yes                     |

Table S8 Novel alleles identified by TruSight HLA for 33 HapMap samples having discordances between Sanger sequencing and RNA sequencing

|          |         |
|----------|---------|
| KIR2DL1  | 95.00%  |
| KIR2DL2  | 75.00%  |
| KIR2DL3  | 95.00%  |
| KIR2DL4  | 90.00%  |
| KIR2DL5A | 40.00%  |
| KIR2DL5B | 50.00%  |
| KIR2DP1  | 95.00%  |
| KIR2DS1  | 90.00%  |
| KIR2DS2  | 90.00%  |
| KIR2DS3  | 100.00% |
| KIR2DS4  | 95.00%  |
| KIR2DS5  | 90.00%  |
| KIR3DL1  | 95.00%  |
| KIR3DL2  | 90.00%  |
| KIR3DL3  | 95.00%  |
| KIR3DP1  | 80.00%  |
| KIR3DS1  | 65.00%  |

Table S9: Accuracy of KIR genotyping at two-field precision.

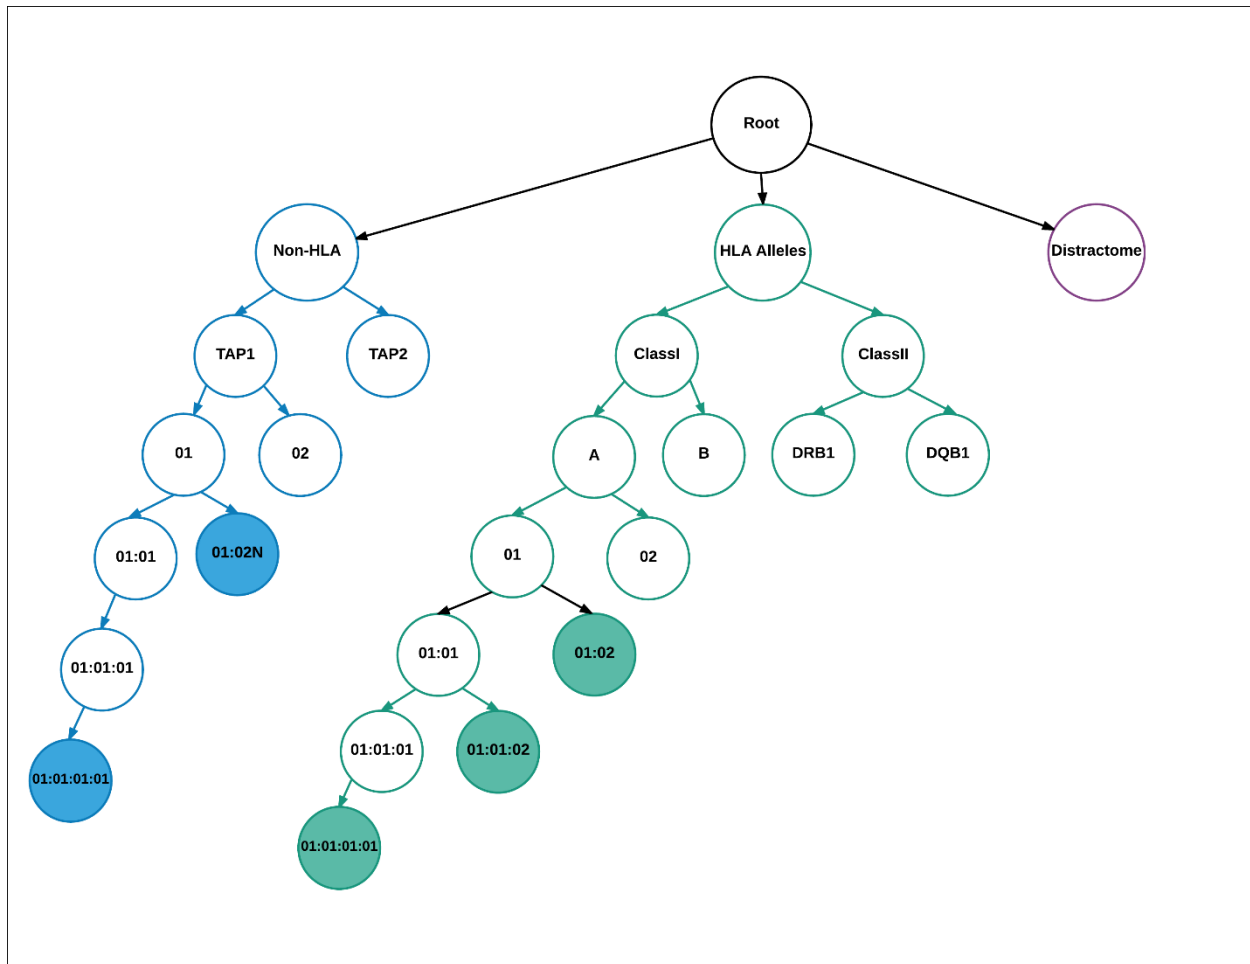

Figure S1. Representative HLA taxonomy. This simple HLA taxonomy represents the more complex, full HLA taxonomy used with the Kraken taxonomic classification software. HLA alleles are divided into a tree based on class, gene, and the precision level of the allele. Genes in the HLA region not falling into ClassI and ClassII are classified in a Non-HLA gene class. The distractome represents all genes not found in the HLA region. Leaf nodes (filled circles) represent actual HLA alleles while other nodes (open circles) represent common ancestors of the allele.

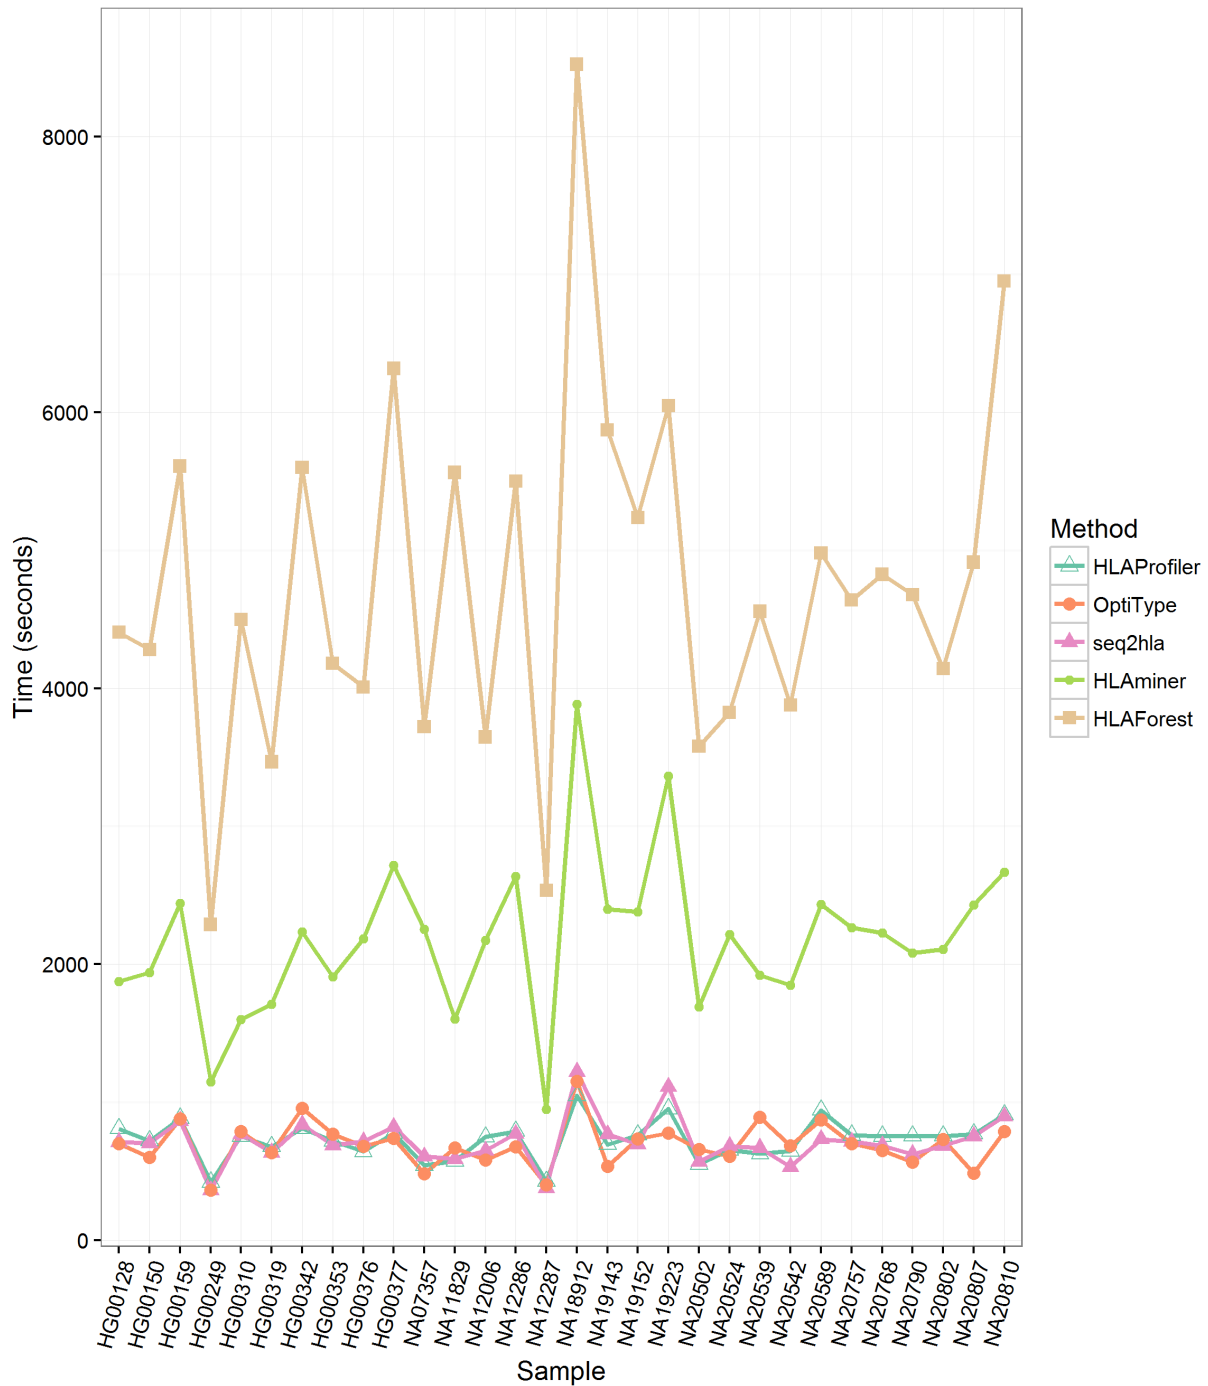

Figure S2: Run times of HLA calling software. Time required to call HLA types in 30 samples randomly selected from the Geuvadis dataset. Each tool was run on the same linux system using 8 threads. Due to licensing restrictions Phlat could not be run on the same system as the other tools and was excluded from this comparison.

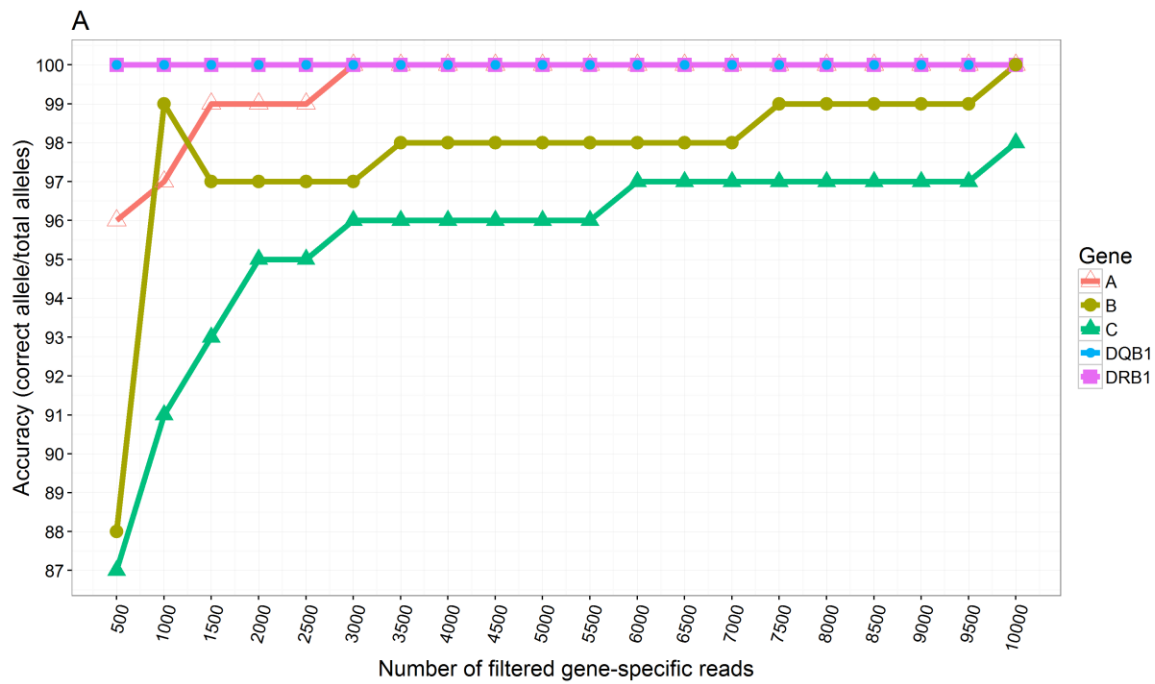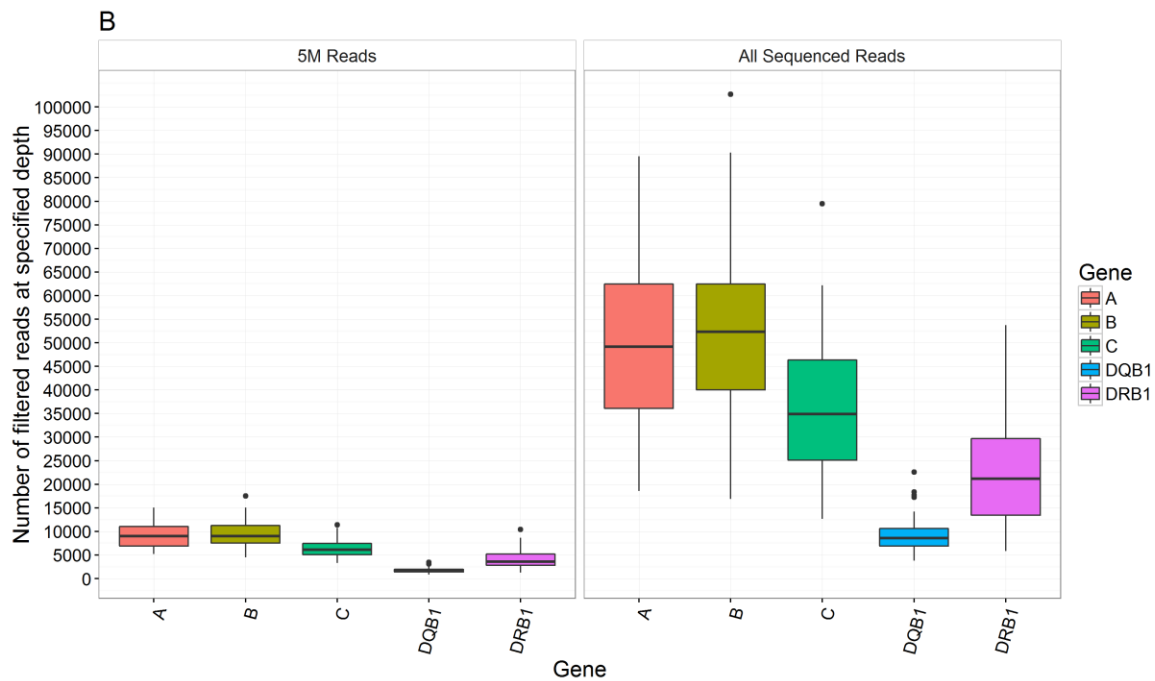

Figure S3: Accuracy of HLAProfiler at low number of reads. 50 Geuvadis samples with all alleles correctly predicted were randomly selected. Filtered reads specific to each gene were downsampled and HLAProfiler run on the downsampled reads. (A) HLAProfiler accuracy at given read depths. (B) The distribution of the number of filtered reads for each gene at a 5M total read depth and when using all sequenced reads (total depths differ).



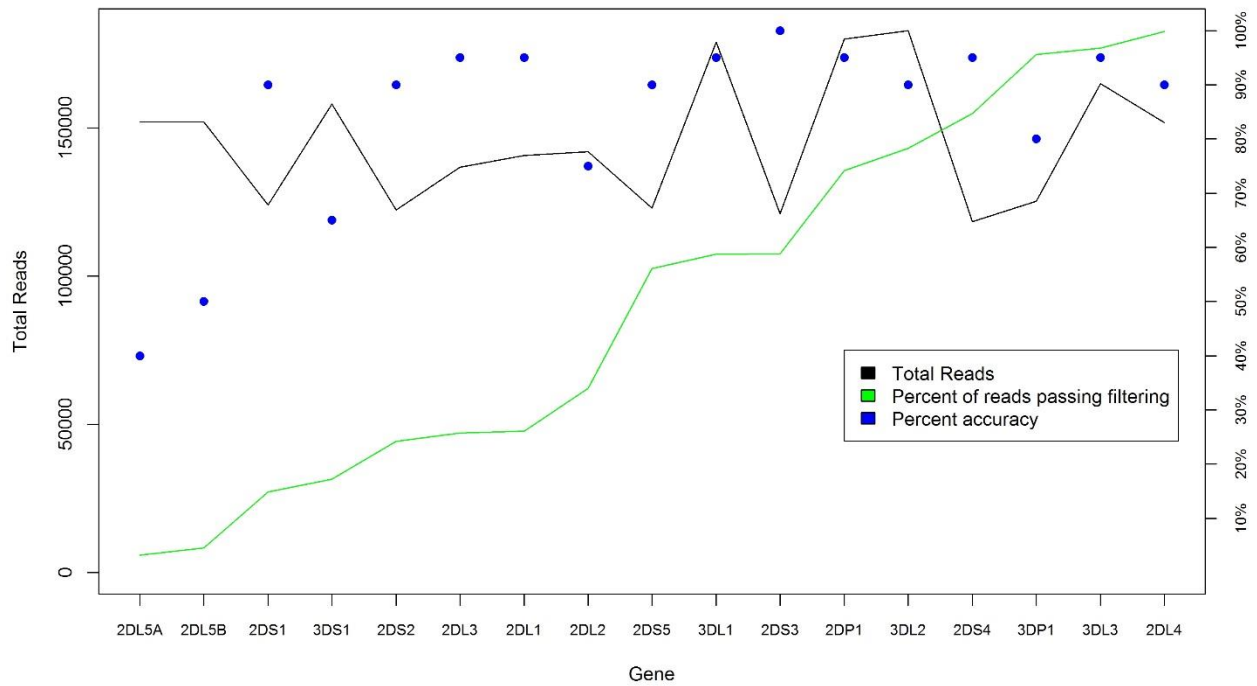

Figure S4: Sequencing read count and KIR genotyping accuracy. KIR genotyping accuracy (blue circle) for each KIR gene compared the total number of reads (black line) simulated for that gene, and the number of reads included in the gene sequences after filtering (green line).
